# Supplementary material
Source: Springer Nature journal article supplement (https://www.springermedizin.de/resource/supplementary/13014_2011_587_MOESM1_ESM.pdf/9634158)
Supplement: MOESM1 [file 9634158]

Additional file 1–Housekeeping genes.

| <b>Symbol</b>                | <b>TaqMan® Assay ID</b> | <b>Name</b>                                                                                       | <b>Function</b>                                                                                                                                             |
|------------------------------|-------------------------|---------------------------------------------------------------------------------------------------|-------------------------------------------------------------------------------------------------------------------------------------------------------------|
| <i>18S</i>                   | Hs99999901_s1           | 18 S ribosomal                                                                                    | Ribosomal RNA                                                                                                                                               |
| <i>ABL1</i>                  | Hs00245445_m1           | Abelson murine leukaemia viral 1                                                                  | Non-receptor tyrosine protein kinase                                                                                                                        |
| <i>ACTB</i>                  | Hs99999903_m1           | Beta-actin                                                                                        | Cytoskeletal structure                                                                                                                                      |
| <i>B2M</i>                   | Hs99999907_m1           | Beta-2-microglobulin                                                                              | Defense/immunity protein                                                                                                                                    |
| <i>CASC3</i>                 | Hs00201226_m1           | Cancer susceptibility candidate 3                                                                 | Nonsense-mediated mRNA decay (NMD)                                                                                                                          |
| <i>CDKN1A</i>                | Hs00355782_m1           | Cyclin-dependent kinase inhibitor 1A                                                              | Regulation of cell growth and cell response to DNA damage                                                                                                   |
| <i>CDKN1B</i>                | Hs00153277_m1           | Cyclin-dependent kinase inhibitor 1B                                                              | To stop or slow down the cell division cycle.                                                                                                               |
| <i>EIF2B1</i>                | Hs00426752_m1           | Eukaryotic translation initiation factor 2B (Translation initiation factor eIF-2B subunit alpha ) | Catalyzes the exchange of eukaryotic initiation factor 2-bound gdp for GTP.                                                                                 |
| <i>ELF1</i>                  | Hs00152844_m1           | 74-like factor 1 (ETS-related transcription factor Elf-1)                                         | Protein, sequence-specific DNA binding, transcription activator activity and transcription factor activity.                                                 |
| <i>GADD45A</i>               | Hs00169255_m1           | Growth arrest and DNA-damage-inducible, alpha                                                     | Binds to proliferating cell nuclear antigen. Stimulates DNA excision repair in vitro and inhibits entry of cells into S phase.                              |
| <i>GAPDH</i>                 | Hs99999905_m1           | Glyceraldehyde-3-phosphate dehydrogenase                                                          | Oxidoreductase, dehydrogenase                                                                                                                               |
| <i>GUSB</i>                  | Hs99999908_m1           | Glucuronidase, beta                                                                               | Galactosidase                                                                                                                                               |
| <i>HMBS</i>                  | Hs00609297_m1           | Hydroxymethyl-bilane synthase                                                                     | Heme synthesis, porphyrin metabolism                                                                                                                        |
| <i>HPRT1</i>                 | Hs99999909_m1           | Hypoxanthine guanine phosphoribosyl transferase 1                                                 | Glycosyltransferase                                                                                                                                         |
| <i>IPO8</i>                  | Hs00183533_m1           | Importin 8                                                                                        | Nuclear protein import                                                                                                                                      |
| <i>MRPL19</i>                | Hs00608519_m1           | Mitochondrial ribosomal protein L19                                                               | Protein biosynthesis                                                                                                                                        |
| <i>MT-ATP6, LOC100133315</i> | Hs02596862_g1           | Mitochondrially encoded ATP synthase 6                                                            | Produces ATP from ADP in the presence of a proton gradient across the membrane which is generated by electron transport complexes of the respiratory chain. |

|               |               |                                                                                          |                                                                                                                                        |
|---------------|---------------|------------------------------------------------------------------------------------------|----------------------------------------------------------------------------------------------------------------------------------------|
| <i>PES1</i>   | Hs00362795_g1 | Pescadillo homolog 1, containing BRCT domain                                             | Component of the PeBoW complex, which is required for maturation of 28S and 5.8S ribosomal RNAs and formation of the 60S ribosome      |
| <i>PGK1</i>   | Hs99999906_m1 | Phospho-glycerate kinase-1                                                               | Catalyzes the reversible conversion of 1,3-diphosphoglycerate to 3-phosphoglycerate during glycolysis, generating one molecule of ATPX |
| <i>POLR2A</i> | Hs00172187_m1 | DNA-directed RNA polymerase II subunit RPB1                                              | DNA-dependent RNA polymerase catalyzes the transcription of DNA into RNA using the four ribonucleoside triphosphates as substrates.    |
| <i>POP4</i>   | Hs00198357_m1 | Ribonuclease P protein subunit p29                                                       | Processing of precursor RNAs                                                                                                           |
| <i>PPIA</i>   | Hs99999904_m1 | Peptidylprolyl isomerase A                                                               | Isomerase                                                                                                                              |
| <i>PSMC4</i>  | Hs00197826_m1 | Proteasome 26S subunit, ATPase, 4                                                        | Protease, hydrolase                                                                                                                    |
| <i>PUM1</i>   | Hs00206469_m1 | Pumilio, Drosophila, homolog of, 1                                                       | Protease, hydrolase                                                                                                                    |
| <i>RPL30</i>  | Hs00265497_m1 | 60S ribosomal protein L30                                                                | Translation                                                                                                                            |
| <i>RPL37A</i> | Hs01102345_m1 | Ribosomal protein L37a                                                                   | Structural constituent of ribosome. Translation                                                                                        |
| <i>RPLP0</i>  | Hs99999902_m1 | Ribosomal protein, large, P0                                                             | Protein biosynthesis                                                                                                                   |
| <i>RPS17</i>  | Hs00734303_g1 | Ribosomal protein S17                                                                    | Provides instructions for making a protein called ribosomal protein S17                                                                |
| <i>TBP</i>    | Hs99999910_m1 | TATA box binding protein                                                                 | General RNA polymerase II transcription factor                                                                                         |
| <i>TFRC</i>   | Hs99999911_m1 | Transferrin receptor                                                                     | Ion receptor                                                                                                                           |
| <i>UBC</i>    | Hs00824723_m1 | Ubiquitin C                                                                              | Protein degradation                                                                                                                    |
| <i>YWHAZ</i>  | Hs00237047_m1 | Tyrosine 3-monooxygenase/tryptophan 5-monooxygenase activation protein, zeta polypeptide | Signal transduction by binding to phosphorylated serine residues on a variety of signaling molecule                                    |
